# Supplementary material for: A meta-analysis of active smoking and risk of meningioma
Source: PubMed Central journal article supplement (PMC8106389; doi:10.18332/tid/133704), 2021-05-10

Supplementary Figure 1. The result of sensitivity analysis of included studies on the active smoking and risk of meningioma

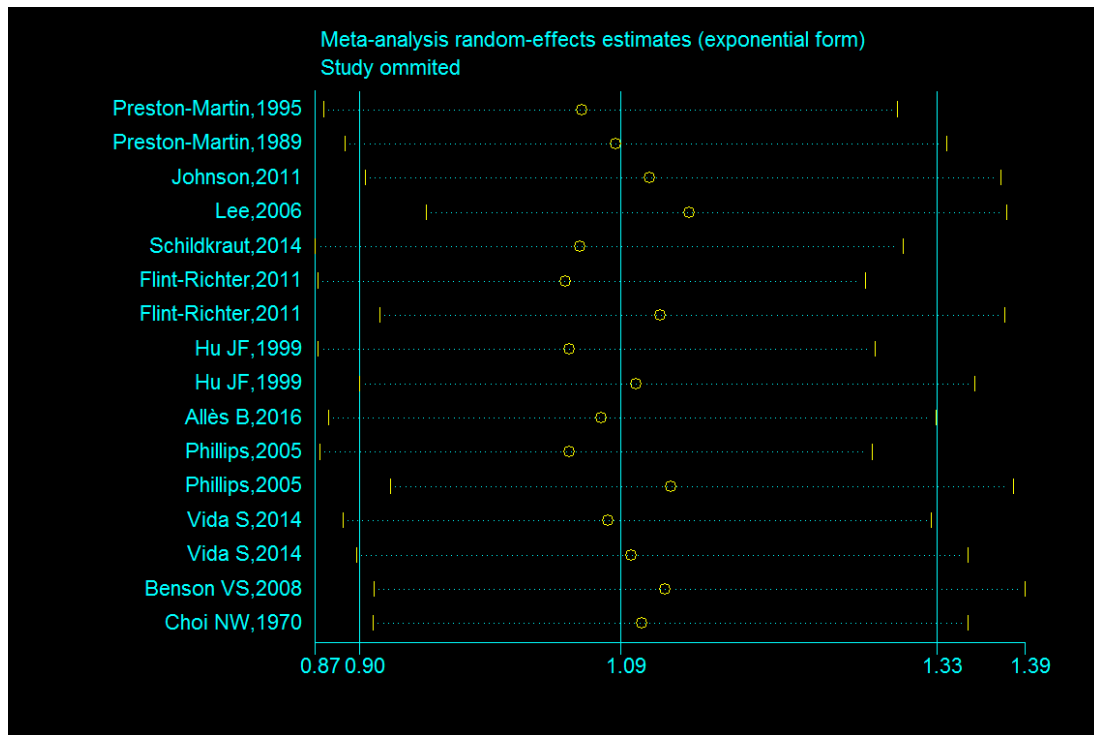

Supplementary Figure 2. The funnel plot of meta-analysis to evaluate publication bias.

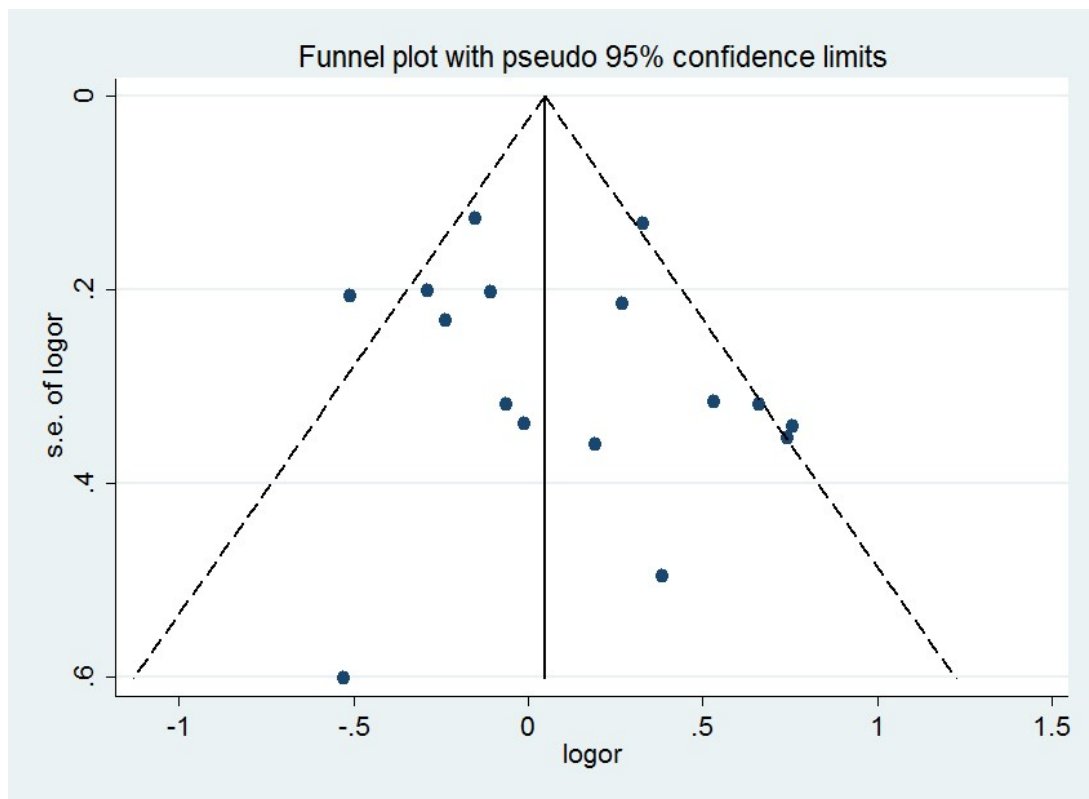

Supplement: TID-19-34-s1.pdf [file TID-19-34-s1.pdf]
